# Supplementary material
Source: MDPI journal article supplement (https://www.mdpi.com/2313-5786/3/1/5)
Supplement: s1 [file s1]

## Supplemental Material

**Supplemental Table S1:** Age at fecal sampling and distribution of IgE-mediated conditions diagnosed during 1st year of life. C, C-section ; d, day ; v, vaginal delivery; w, weeks.

[illegible]

---

**Supplemental Table S2.** Complete list of multiplexed allergens (whole allergens and molecules) assessed in the study.

|          |                  |              |                  |                  |                   |
|----------|------------------|--------------|------------------|------------------|-------------------|
| Aca m    | Blag 1           | Cor a_pollen | Gal d_white      | Ori v            | Pop n             |
| Aca s    | Blag 2           | Cra c 6      | Gal d_yolk       | Ory c 1          | Pru av            |
| Ach d    | Blag 4           | Cry j 1      | Gly d 2          | Ory c 2          | Pru du            |
| Act d 1  | Blag 5           | Cuc m 2      | Gly m 4          | Ory c 3          | Pru p 3           |
| Act d 10 | Blag 9           | Cuc p        | Gly m 5          | Ory s            | Pru p 7           |
| Act d 2  | Blo t 10         | Cup a 1      | Gly m 6          | Ory_meat         | Pyr c             |
| Act d 5  | Blo t 21         | Cup s        | Gly m 8          | Ost e            | Raj c             |
| Ail a    | Blo t 5          | Cyn d        | Hel a            | Ovi a_epithelia  | Raj c Parvalbumin |
| All c    | Bos d 2          | Cyn d 1      | Hev b 1          | Ovi a_meat       | Rat n             |
| All s    | Bos d 4          | Cyp c 1      | Hev b 11         | Ovi a_milk       | Rud spp.          |
| Aln g 1  | Bos d 5          | Dau c        | Hev b 3          | Pan b            | Sac c             |
| Aln g 4  | Bos d 6          | Dau c 1      | Hev b 5          | Pan m            | Sal k             |
| Alt a 1  | Bos d 8          | Der f 1      | Hev b 6.02       | Pap s            | Sal k 1           |
| Alt a 6  | Bos d_meat       | Der f 2      | Hev b 8          | Pap s 2S Albumin | Sal s             |
| Ama r    | Bos d_milk       | Der p 1      | Hom g            | Par j            | Sal s 1           |
| Amb a    | Bro pa           | Der p 10     | Hom s LF         | Par j 2          | Sco s             |
| Amb a 1  | Cam d            | Der p 11     | Hor v            | Pas n            | Sco s 1           |
| Amb a 4  | Can f 1          | Der p 2      | Jug r 1          | Pec spp.         | Sec c_flour       |
| Ana o    | Can f 2          | Der p 20     | Jug r 2          | Pen ch           | Sec c_pollen      |
| Ana o 2  | Can f 3          | Der p 21     | Jug r 3          | Pen m 1          | Ses i             |
| Ana o 3  | Can f 4          | Der p 23     | Jug r 4          | Pen m 2          | Ses i 1           |
| Ani s 1  | Can f 6          | Der p 5      | Jug r 6          | Pen m 3          | Sin               |
| Ani s 3  | Can f_Fd1        | Der p 7      | Jug r_pollen     | Pen m 4          | Sin a 1           |
| Api g 1  | Can f_male urine | Dol spp      | Jun a            | Per a            | Sol spp.          |
| Api g 2  | Can s            | Equ c 1      | Len c            | Per a 7          | Sol t             |
| Api g 6  | Can s 3          | Equ c 3      | Lep d 2          | Pers a           | Sola l            |
| Api m    | Cap a            | Equ c 4      | Lit s            | Pet c            | Sola l 6          |
| Api m 1  | Cap h_epithelia  | Equ c_meat   | Loc m            | Pha v            | Sus d 1           |
| Api m 10 | Cap h_milk       | Equ c_milk   | Lol p 1          | Phl p 1          | Sus d_epithelia   |
| Ara h 1  | Car c            | Fage         | Lol spp.         | Phl p 12         | Sus d_meat        |
| Ara h 15 | Car i            | Fage 2       | Lup a            | Phl p 2          | Ten m             |
| Ara h 2  | Car p            | Fag s 1      | Mac i 2S Albumin | Phl p 5.0101     | Thu a             |
| Ara h 3  | Cav p 1          | Fel d 1      | Mac inte         | Phl p 6          | Thu a 1           |
| Ara h 6  | Che a            | Fel d 2      | Mal d 1          | Phl p 7          | Tri a 14          |
| Ara h 8  | Che a 1          | Fel d 4      | Mal d 2          | Pho d 2          | Tri a 19          |
| Ara h 9  | Che q            | Fel d 7      | Mal d 3          | Phod s 1         | Tri a aA_TI       |
| Arg r 1  | Chi spp.         | Fic b        | Mala s 11        | Phr c            | Tri fo            |
| Art v    | Cic a            | Fic c        | Mala s 5         | Pim a            | Tri s             |
| Art v 1  | Cit s            | Fra a 1+3    | Mala s 6         | Pis s            | Tyr p             |
| Art v 3  | Cla h            | Fra e        | Man i            | Pis v 1          | Tyr p 2           |
| Asp f 1  | Cla h 8          | Fra e 1      | Mel g            | Pis v 2          | Ulm c             |
| Asp f 3  | Clu h            | Gad m        | Mer a 1          | Pis v 3          | Urt d             |
| Asp f 4  | Clu h 1          | Gad m 1      | Mes a 1          | Pis v 4          | Vac m             |
| Asp f 6  | Cor a 1.0103     | Gad m 2+3    | Mor r            | Pla a 1          | Ves v             |
| Ave s    | Cor a 1.0401     | Gal d 1      | Mus a            | Pla a 2          | Ves v 1           |
| Ber e    | Cor a 11         | Gal d 2      | Mus m 1          | Pla a 3          | Ves v 5           |
| Ber e 1  | Cor a 12         | Gal d 3      | Myt e            | Pla l            | Vit v 1           |
| Bet v 1  | Cor a 14         | Gal d 4      | Ole e 1          | Pla l 1          | Xip g 1           |
| Bet v 2  | Cor a 8          | Gal d 5      | Ole e 7          | Pol d            | Zea m             |
| Bet v 6  | Cor a 9          | Gal d_meat   | Ole e 9          | Pol d 5          | Zea m 14          |

---
